# Supplementary material
Source: PubMed Central journal article supplement (PMC3271586)
Supplement: cr2011119x1.pdf [file cr2011119x1.pdf]

## Supplementary information, Figure S1

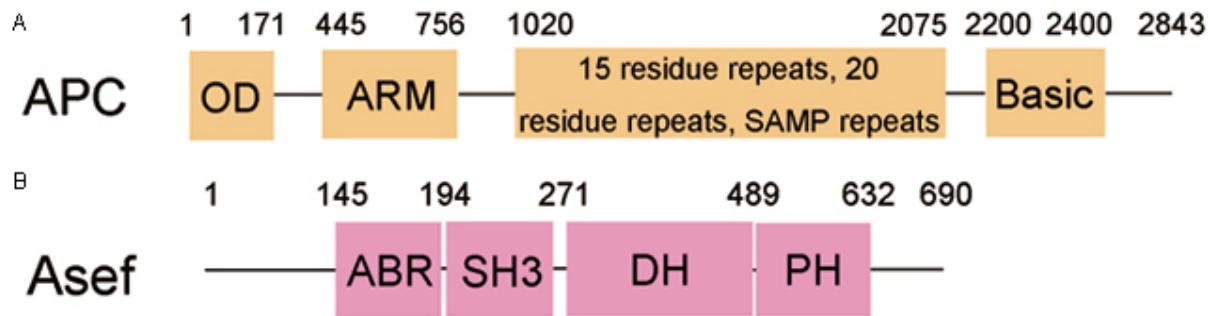

**Figure S1** Domain structures of human APC and human Asef. **(A)** The domain structure of human APC. The oligomerization domain (OD), armadillo repeat domain (ARM), the region for  $\beta$ -catenin-binding (the 15-residue repeats and 20-residue repeats) and Axin-binding (the SAMP repeats), and the basic domain that interacts with microtubules are shown as rectangles, with their boundary residue numbers also shown. **(B)** The domain structure of human Asef. The APC binding region (ABR), Src homology 3 domain (SH3), Dbl homology domain (DH), and pleckstrin homology domain (PH) of Asef are shown in rectangles, with their boundary residue numbers also shown.
