# Supplementary material
Source: PubMed Central journal article supplement (PMC3271586)
Supplement: cr2011119x2.pdf [file cr2011119x2.pdf]

## Supplementary information, Figure S2

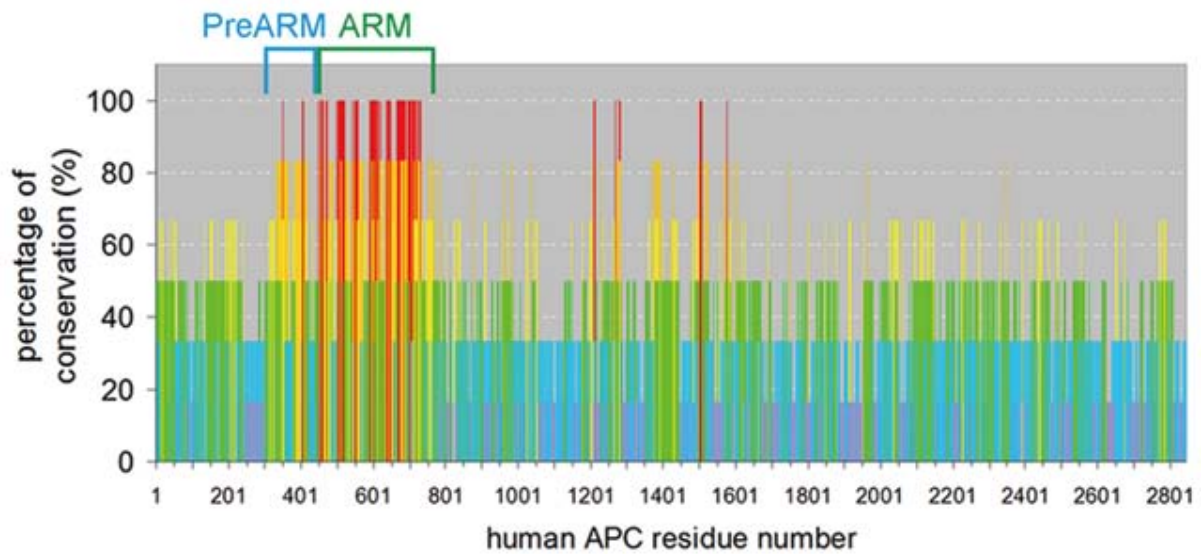

**Figure S2** Percentage of conservation of human APC residues. Human, zebrafish, and *Drosophila* APC, human and *Drosophila* APC2, and *C. elegans* APR-1 sequences were aligned by the ClustalW method. Percentage of conservation for each human APC residue was shown as a red, orange, yellow, green, blue, or purple bar from high to low conservation.
