# Supplementary material
Source: PubMed Central journal article supplement (PMC3271586)
Supplement: cr2011119x3.pdf [file cr2011119x3.pdf]

Supplementary information, Figure S3

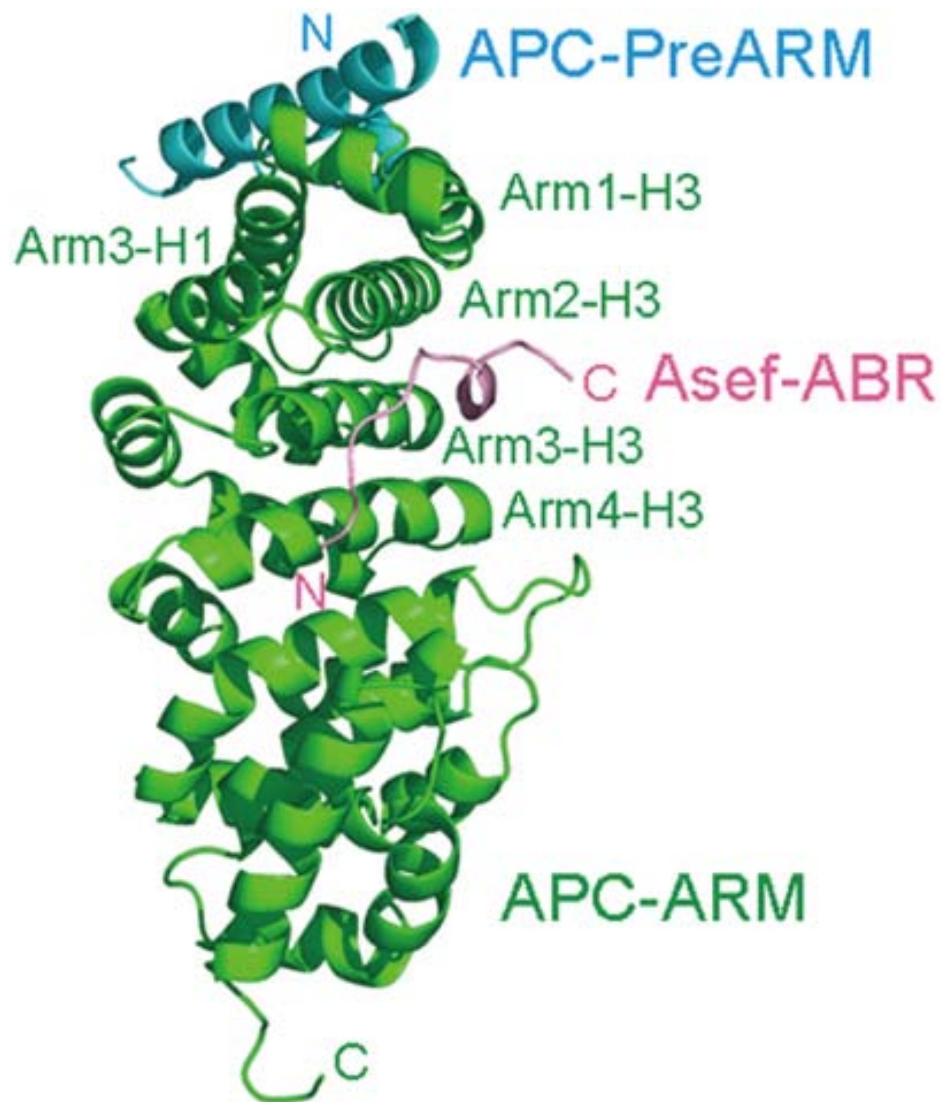

**Figure S3** The 2.3 Å resolution crystal structure of the APC (residues 407-751)/Asef (residues 170-194) complex. The APC-ARM portion, the APC-PreARM portion, and Asef-ABR are shown in green, cyan, and pink, respectively. APC secondary structure elements interacting with Asef-ABR are labeled.
