# Supplementary material
Source: PubMed Central journal article supplement (PMC3271586)
Supplement: cr2011119x7.pdf [file cr2011119x7.pdf]

Supplementary information, Figure S7

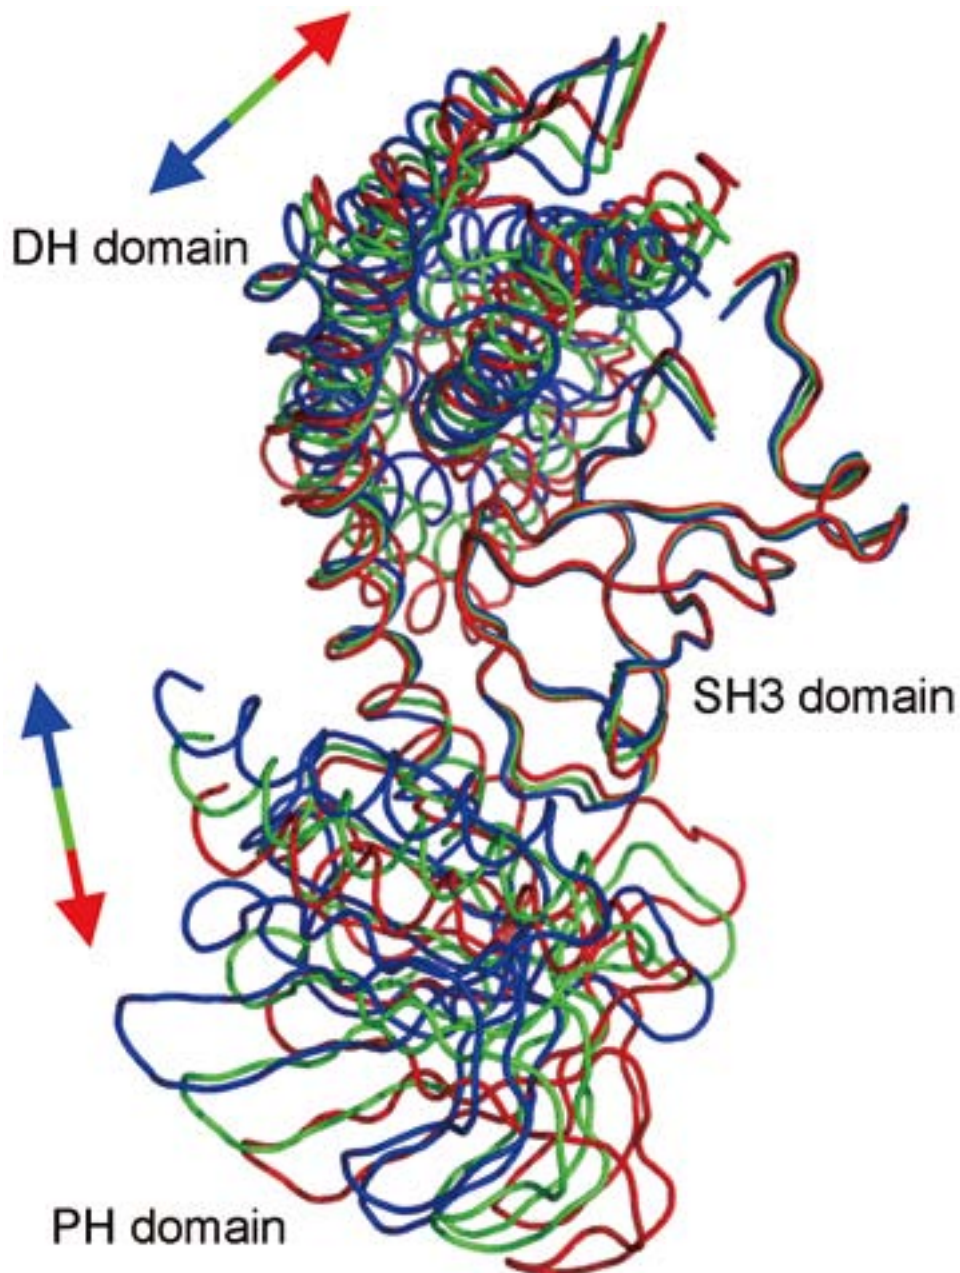

**Figure S7** Normal mode analysis for the Asef protein. The crystal structure of autoinhibited Asef (PDB code: 2PZ1) was used as the initial state of Asef. For the 7<sup>th</sup> normal mode (the first six modes are translational and rotational modes), states 1, 8 and 24 (colored in green, red, and blue) of Asef from the normal mode analysis were superimposed by aligning their SH3 domains.
