# Supplementary material
Source: PubMed Central journal article supplement (PMC3271586)
Supplement: cr2011119x8.pdf [file cr2011119x8.pdf]

Supplementary information, Figure S8

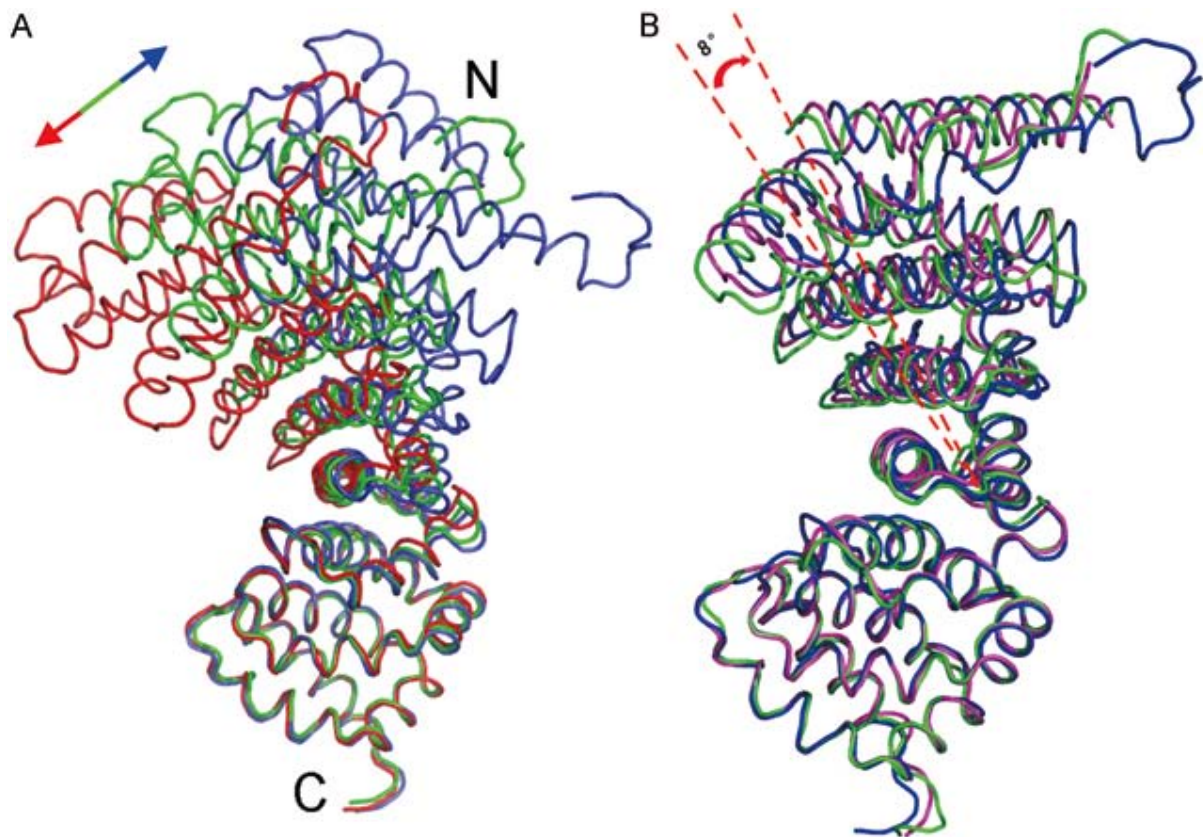

**Figure S8** APC-ARM has an intrinsic flexibility. **(A)** Normal mode analysis for APC-ARM. The crystal structure of APC-ARM by itself was used as the initial state. For the 7<sup>th</sup> normal mode (the first six modes are translational and rotational modes), states 1, 8 and 24 (colored in green, red, and blue) of APC-ARM from the normal mode analysis were superimposed by aligning their C-terminal halves. **(B)** Structures of APC (407-751) (colored in green), the APC (407-751)/Asef (170-194) complex (colored in magenta) and the APC (303-739)/Asef (170-271) complex (colored in blue) are superimposed by aligning their C-terminal parts. There is a  $\sim 8^\circ$  of rotation for the N-terminal part of APC-ARM relative to the C-terminal part.
